# Supplementary material for: Subgrid-scale variability of cloud ice in the ICON-AES-1.3.00
Source: Copernicus journal article supplement (doi:10.5194/gmd-2022-34), 2023-11-09
Supplement: Supplementary file [file gmd-2022-34-AC1-supplement.pdf]

Dear Editor,

We thank the reviewer for thoroughly reviewing our work and providing us with the chance to improve our study. We have carefully considered and incorporated your comments and suggestions into the revised manuscript. We are confident that the alterations made, including those you highlighted, have effectively addressed the concerns.

Please find below the modifications made at the manuscript. The review comments are in black, our point-by-point responses are in red color, and the changes to the manuscript are in blue color.

Sincerely,

Sabine Doktorowski on behalf of all coauthors

Responses to referee comments on the Manuscript "Subgrid-scale variability of cloud ice in the ICON-AES 1.3.00", by Doktorowski et al.

### General Comments

This article is well structured and clear, and the language is fluent and precise. While there is a significant body of literature detailing methods for and consequences of accounting for subgrid variability of cloud water content in atmospheric model radiation calculations and warm rain processes, to my knowledge there are no previous studies on accounting for subgrid variability of cloud ice in microphysical process calculations. The methods are clearly described, and the results support the interpretation and conclusions.

My main concern with the article is that I think this is quite a minor advance in modelling science – in the authors' own words, this produces "no important change in radiation". The title of the article suggests a broad analysis of subgrid scale variability of cloud ice in the model, but the study is limited to a single process. I think this paper would be more significant if it considered other processes. Do any of the other ice microphysics processes in the model have a nonlinear dependence on ice water content? If so, can this method be extended to those processes? What about the model radiative transfer calculations? Do they account for subgrid-scale variability of cloud ice and if so, do they use the same variability as used for ice aggregation here? We thank the reviewer for this point. The aggregation is the only cloud ice related microphysical process, that is not linear. Therefore, we just implemented it in the aggregation process. Besides from that, we wanted to show the effect on one single process, to quantify, how big the effect on the process rate is. We agree, that we could increase the effect, if it would be possible to extend this method to other cloud ice processes. Since the model doesn't include any subgrid-scale approach for the radiation, this could be part of further studies to implement such an approach to the radiation scheme. Additionally, one can think of using this method for cloud water processes, which lead to a gain of cloud ice (e.g. freezing). To goal of this study is to show the effect of this stochastic approach, which doesn't need any further computational time, on the aggregation rate, which is a cloud ice related process. Since this method is so simple, it could be used for every non-linear process rate, also in other models, were maybe more cloud ice related processes are non-linear.

### Specific Comments

1. It would be good to include analytically derived corrections (e.g., Morrison and Gettelman, 2008; Larson and Griffin, 2012; Boutle et al, 2014) in the discussion of how the effects of subgrid variability of cloud water content on microphysical process rates have been represented in previous studies. Although most of this literature focuses on warm rain microphysics rather than ice, I think it is relevant to the discussion. Is it possible to derive an analytical correction to

- 45 the ice aggregation rate? Thank you very much for this input. We included additional text in the introduction to high-  
light, that our focus is on cloud ice related processes in contrast to previous studies, which focused more on liquid water  
processes. While it is possible to do a numerical integration, here we focus on this stochastic approach, since it doesn't  
need additional computational time, as it is the case in e.g. Larson and Griffin (2012). Therefore, we included Figure 8  
50 to show, how the comparison between the stochastic method and a sampled method, where we sampled over the entire  
distribution, looks like. Since this plot shows a good agreement, we just want to go for this simple method.  
Including the subgrid-scale effect in the autoconversion and accretion rate in warm clouds reduces the bias significantly  
and leads to an enhancement of the process rate (Boutle et al., 2014; Lebsock et al., 2013). Since previous studies mainly  
focus on warm rain formation processes (e.g., Morrison and Gettelman, 2008; Larson and Griffin, 2013; Boutle et al.,  
2014; Lebsock et al., 2013), it is also important to concentrate on snow formation effects, by taking subgrid-scale effects  
55 into account.
2. Can you explain why you only apply a representation of the effects of subgrid variability of ice water to the aggregation  
calculation? Do other ice microphysical processes in ICON-AES depend nonlinearly on ice water content? Thank you  
for this question. Aggregation is the only non-linear process, which depends on  $q_i$ . And since we wanted to concentrate  
on cloud ice related processes, we just implemented the stochastic approach into the aggregation. The method can also  
60 be extended to liquid water related processes. We added in the manuscript: Besides from that, the aggregation process  
is the only non-linear cloud ice process rate in the ICON-AES. Since we focused on cloud ice related processes we just  
implemented the subgrid-scale approach in the aggregation parameterization.
  3. Does the ICON-AES radiation scheme include the effect of subgrid variability of ice water content on radiative fluxes  
and heating rates? If so, what does it use for the subgrid variability? Assuming the radiation scheme does not already  
65 use ice cloud water content variability that is consistent with the cloud scheme, what difference would this make? The  
radiation scheme in the ICON-AES doesn't include subgrid variability of ice water content beyond the vertical overlap of  
cloudy layers. But it is indeed an interesting point. One can try to implement an subgrid-scale approach in the radiation  
scheme in further studies.
  4. I am not convinced that the comparison between DARDAR and the model is particularly useful. I think it would be  
70 more useful to compare aggregation rates calculated using the cloud scheme subgrid ice variance, aggregation rates  
calculated using the "true" variance (i.e., values derived from DARDAR) and aggregation rates calculated using only  
the mean value (i.e., a similar analysis to that done for figure 8). This could be an additional plot and, in my opinion,  
would better demonstrate the utility of the cloud scheme subgrid ice cloud variance. We thank you for this interesting  
75 point. Since aggregation rates are not retrieved from the satellite measurements, we decided to compare the cloud ice  
variances, because it is a more straight forward comparison. Of course there are still some uncertainties and differences  
between modeled and the "true" variance. Nevertheless, using the cloud ice variance from DARDAR and putting this  
into the aggregation parametrization makes it more unclear in our opinion, since the aggregation rate depends on other  
conditions. Therefore, we think it is a better way instead of putting additional uncertain conditions in the comparison,  
we directly tried to compare the variances. However, we do consider the differences between the assumed cloud ice  
80 distribution and the real cloud ice distribution. We added to the main text: However, we should keep in mind, that the  
measured variance contains uncertainties regarding the method of filtering precipitation and convection. Additionally the  
modeled cloud ice variance makes an assumption of a distribution, while the DARDAR data shows the the variance from  
discrete measurements. Despite these discrepancies [...]
  5. I'm not sure how fair it is to compare the variance along a 1D line through a cloud (i.e., what DARDAR sees) with that  
85 in a 3D gridbox (ICON-AES). For example, Hill et al (2015) estimated that the standard deviation of water content in a  
2D cloud would be approximately 1.3 times larger than that in a 1D cross-section through the cloud. Can you comment  
on how this might affect your DARDAR – model comparison? Thank you for recommending this study from Hill et  
al (2015). It is indeed a very important point to highlight, that there are uncertainties comparing a 1D track with a 3D  
90 gridbox. We included a brief discussion in the method to include your suggested study.  
Additionally, the initial satellite data are measured on a 1D curtain, while the model uses 3D grid boxes. Hill et al.

(2015) calculated a measure of the difference in standard deviation considering a 2D cloud field compared to a 1D cross-section. They estimated a 30% larger standard deviation in 2D fields compared to the 1D track. Therefore, we should also consider, that this has an effect also on our the cloud ice variance calculation. However, there are limitations in availability of satellite data. Therefore we tried to be consistent as possible in the comparison between simulations and observations.

95

6. I'm not entirely convinced that the way that the DARDAR data is sampled (I.e., removing convective and precipitating ice) achieves the aim of making it more consistent with the model. It would be interesting to see how much difference removing convective and precipitating ice makes to the variance of ice water content calculated from DARDAR. It would also be interesting to try some alternative comparisons between the two. For example, precipitating ice is removed from DARDAR based on a surface precipitation flag. What difference would it make if you removed ICON points with nonzero surface precipitation from the comparison? We thank you for this interesting suggestion. We agree, that alternative comparison between the model and the satellite data would be very interesting. We decided to use this method, since we wanted to compare the cloud ice variance and the cloud ice, which is directly used for the aggregation parameterization. The cloud ice, which is used for microphysical processes, doesn't contain any snow particles. In order to have a proper comparison between satellite cloud ice and the cloud ice used in the aggregation, we had to adjust the satellite data in the way, that we tried to remove precipitation and convection based on the study of Li et. al. (2012). Further studies can be focused more on what is the best way to compare modeled and observed cloud ice.

100

105

In order to compare modeled cloud ice with observations, alternative methods are possible (e.g. removing ICON non-zero surface precipitation points,...). Since we want to evaluate the cloud ice distribution, that is used for the aggregation, we had to adjust the DARDAR data in order to find the most consistent way.

110

7. For Figure. 2 and 3 a third column showing the difference between the two would be really useful. If necessary, you could plot this at lower resolution to reduce noise. Thank you very much for this advise to create a third column with differences to Figure 3 and 4 (now Figure 5). Since you wrote Figure 2 and 3, we also added the difference to Figure 2.

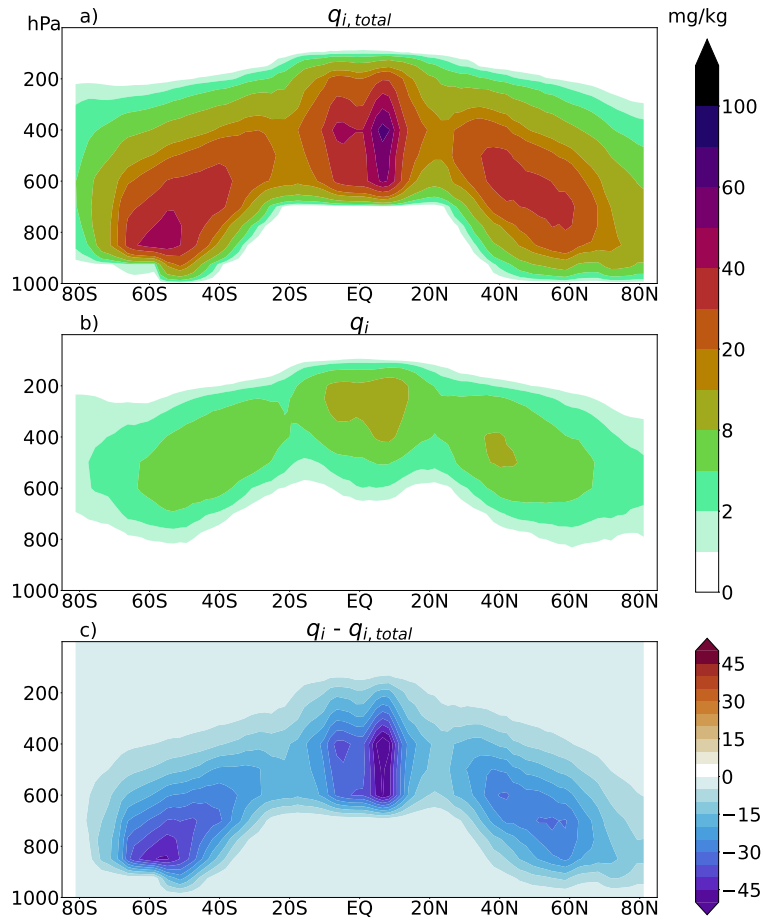

**Figure 2.** Zonally averaged annual mean of ice water content (mg/kg) from the DARDAR data set. a) total ice mixing ratio ( $q_{i,total}$ ), which includes cloud ice from any clouds, and precipitating ice; b) cloud ice mixing ratio ( $q_i$ ), where precipitating and convective cloud ice are removed; c) difference between  $q_{i,total}$  and  $q_i$ .

- 115 8. You state that there is “No important change in radiation”. Is this also true for precipitation rates? If this doesn’t lead to any important changes then is it worth implementing in the model? **Interesting point. The implementation of the subgrid-scale approach is a more accurate way to describe the cloud. Since it needs no further computational time, it is an easy way to bring a more realistic description of cloud ice to the model. We mainly wanted to show, what the effect of this statistic approach is. Since this method can be extended to other processes (also cloud water processes), we first needed a study on how the effect is for one single process rate, even there is no strong signal in radiation and precipitation.**
- 120 9. I think it may better to have figure 8 and the discussion of the change in aggregation rate before figure 5, to demonstrate that the stochastic method does a good job or reproducing the unbiased aggregation rate before showing the effect of the stochastic method in the model. **Thank you for this useful advise. Instead of rearranging the result part, we hint at this part already in the method and introduction part, to focus on it.**
- 125 **Introduction part:** As an additional evaluation, we compare an unbiased process rate with the stochastic approach in order to investigate, how well this simple method performs.
- Method part:** To compare the current, biased aggregation rate ( $Q_{agg}(\bar{q}_i)$ ) with the unbiased process rate [...] with the integral over the entire distribution of  $q_i$ . This comparison will be shown in the last part of the results.

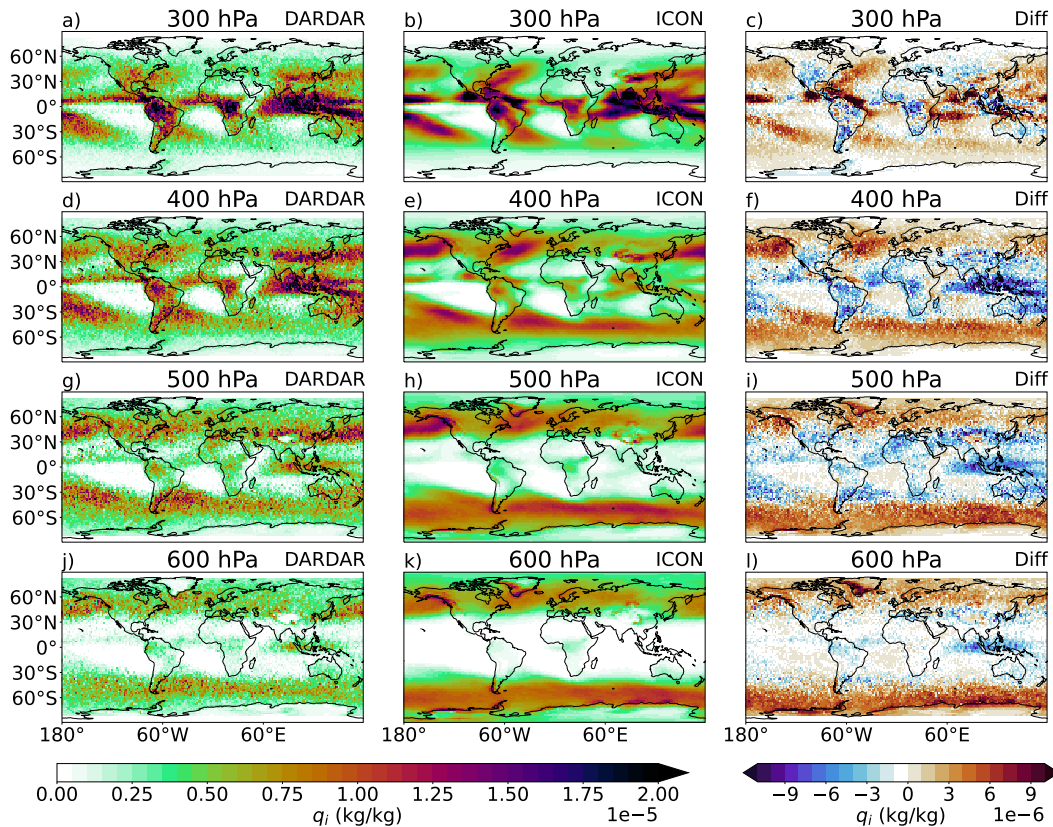

**Figure 3.** Multiyear mean of the cloud ice mixing ratio ( $\text{kg kg}^{-1}$ ) at four different pressure levels calculated for the DARDAR data (a,d,g,j), the ICON data (b,e,h,k) and difference between ICON and DARDAR (c,f,i,j).

10. The paper is quite concise already but could be made more so by removing table 1, which in my opinion does not add a great deal. Thank you for this suggestion. We removed the table from the main text. We just kept the text with the percentage numbers without showing the table, since we think it is useful to quantify the change in aggregation and accretion rate.

### Technical Corrections

1. L5: “For a realistic comparison ... removed from the observational data set.” I think this is more technical detail than is needed for an abstract and suggest removing this sentence. We removed the sentence from the abstract.
2. L6: “The global patterns of ... despite some regional differences”. This is a bit vague, and I would add some more specific details e.g., quantify the % difference between the model and observations. Good point. We extended the sentence as follows: The global patterns of simulated and observed cloud ice mixing ratio variance are in a good agreement, despite an underestimation in the tropical regions, especially at lower altitudes, and an overestimation in higher latitudes from the modeled variance.
3. L39: “Instead of taking a grid-box mean ... with a randomly chosen cloud ice mass”. I think it might be clearer to rewrite this as: “... with a cloud ice mass randomly chosen from the distribution of cloud ice mass assumed in the

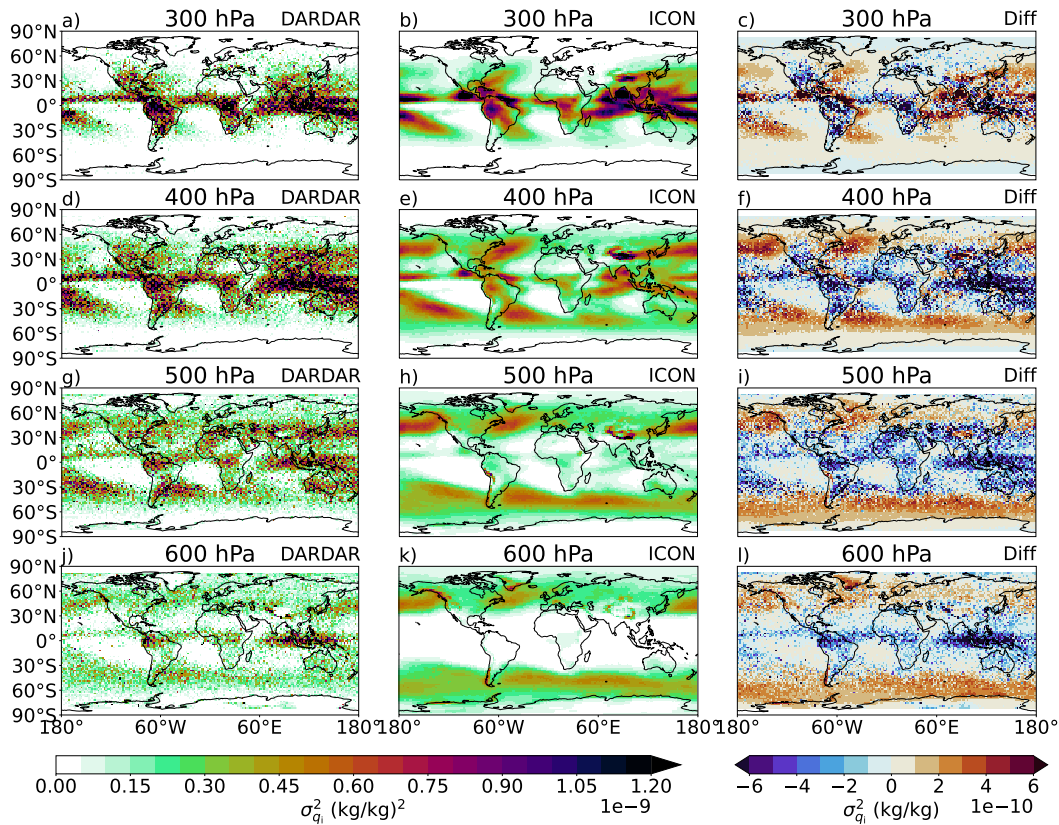

**Figure 4.** Same as figure 3 but for cloud ice variance ( $\text{kg}^2 \text{kg}^{-2}$ )

cloud scheme”. We changed the sentence as follows: Instead of taking a grid-box mean in-cloud ice mixing ratio for the non-linear aggregation parameterization, we feed the process rate with a cloud ice mass randomly chosen from the distribution of cloud ice mass assumed in the cloud scheme.

145

4. L57: Change “with an instantaneously output” to “with instantaneous diagnostics output” We changed this phrase.

5. L86: Change “which allows biases” to “which introduces biases”. We changed it towards your suggestion.

6. L171: “see the supplement material” should be “see the supplementary material”. However, I was not able to find any supplementary material to view anyway. Thank you for finding this mistake. We removed the supplementary material after the editors comments. We now removed this phrase from the main text.

150

7. L177: typo “at the same lebvels”.

We corrected the typo.

8. L179: Change “Therefore it is usable for” to “Therefore it is suitable for use in”. We changed the sentence towards your suggestion

155

9. L188: typo: “averaged aggregattion rate” We corrected the typo.
